# Supplementary material for: The first bismuth–NHC complexes
Source: Royal Society of Chemistry journal article supplement (doi:10.1039/c3dt52715h), 2013-10-18
Supplement: c3dt52715h.pdf [file c3dt52715h.pdf]

# Supporting Information for

## The first bismuth-NHC complexes

*Antonino Aprile, Robert Corbo, Kel Vin Tan, David J. D. Wilson and Jason L. Dutton\**

Department of Chemistry, La Trobe Institute for Molecular Science, La Trobe University,

Melbourne, Victoria, Australia

[j.dutton@latrobe.edu.au](mailto:j.dutton@latrobe.edu.au)

### Cartesian coordinates of optimized geometries.

#### NHC<sup>Me</sup>-BiCl<sub>3</sub>

M06-2X/def2-SV(P)

|    |           |           |           |
|----|-----------|-----------|-----------|
| Bi | 0.921566  | 0.163873  | -0.327580 |
| Cl | 1.609656  | -1.058949 | 1.731166  |
| Cl | 0.702944  | 2.499540  | 0.885336  |
| Cl | 0.287996  | -1.985884 | -1.723364 |
| C  | -1.389364 | 0.000377  | 0.128205  |
| N  | -2.048378 | -1.003667 | 0.732577  |
| N  | -2.329266 | 0.878717  | -0.269584 |
| C  | -3.580970 | 0.432664  | 0.088696  |
| C  | -3.401385 | -0.754740 | 0.725581  |
| C  | -1.449209 | -2.215246 | 1.290160  |
| C  | -2.084543 | 2.093892  | -1.039658 |
| H  | -4.482973 | 0.993435  | -0.141510 |
| H  | -4.115745 | -1.442038 | 1.171092  |
| H  | -2.971728 | 2.736990  | -0.963148 |
| H  | -2.253527 | -2.949049 | 1.435068  |
| H  | -1.215730 | 2.617467  | -0.611756 |
| H  | -0.714619 | -2.604417 | 0.570084  |
| H  | -0.955721 | -1.990204 | 2.245082  |
| H  | -1.913754 | 1.839275  | -2.097944 |

M06-2X/def2-TZVP

|    |           |           |           |
|----|-----------|-----------|-----------|
| Bi | 0.905430  | 0.180834  | -0.330317 |
| Cl | 1.666157  | -1.017261 | 1.674044  |
| Cl | 0.628772  | 2.466239  | 0.952483  |
| Cl | 0.327000  | -1.984149 | -1.718645 |
| C  | -1.371849 | -0.027953 | 0.127750  |
| N  | -2.026061 | -1.000958 | 0.777706  |
| N  | -2.314881 | 0.820260  | -0.313594 |
| C  | -3.562136 | 0.385969  | 0.064152  |
| C  | -3.378254 | -0.759433 | 0.756565  |
| C  | -1.424563 | -2.178264 | 1.399417  |
| C  | -2.074199 | 1.985397  | -1.156645 |
| H  | -4.456949 | 0.923666  | -0.192317 |
| H  | -4.081685 | -1.419799 | 1.230699  |
| H  | -2.986898 | 2.573839  | -1.195468 |
| H  | -2.214262 | -2.907322 | 1.560753  |
| H  | -1.276281 | 2.584881  | -0.722662 |
| H  | -0.677752 | -2.591441 | 0.725282  |
| H  | -0.962226 | -1.907181 | 2.344832  |
| H  | -1.814800 | 1.662628  | -2.165029 |

## NHC<sup>Ph</sup>-BiCl<sub>3</sub>

M06-2X/def2-SV(P)

|    |           |           |           |
|----|-----------|-----------|-----------|
| Bi | 0.234774  | -1.249074 | -0.186198 |
| Cl | -2.105116 | -1.580279 | -0.980299 |
| Cl | -0.232117 | -1.267627 | 2.451808  |
| Cl | 1.178797  | -0.237745 | -2.415635 |
| C  | 0.008031  | 1.059625  | 0.215916  |
| N  | -1.048941 | 1.886342  | 0.229417  |
| N  | 1.094639  | 1.849690  | 0.298422  |
| C  | 0.726651  | 3.181443  | 0.334930  |
| C  | -0.630403 | 3.204084  | 0.292458  |
| H  | 1.461083  | 3.977888  | 0.421314  |
| H  | -1.341895 | 4.024764  | 0.330244  |
| C  | -2.427548 | 1.481769  | 0.211493  |
| C  | -3.222168 | 1.843410  | -0.873135 |
| C  | -2.922734 | 0.724857  | 1.268928  |
| C  | -4.551923 | 1.431604  | -0.898675 |
| H  | -2.789458 | 2.412335  | -1.699665 |
| C  | -4.252885 | 0.312794  | 1.225916  |
| H  | -2.258332 | 0.423411  | 2.083706  |
| C  | -5.064773 | 0.664568  | 0.148165  |
| H  | -5.183620 | 1.695581  | -1.749659 |
| H  | -4.650703 | -0.299575 | 2.037914  |
| H  | -6.104770 | 0.331112  | 0.117937  |
| C  | 2.438090  | 1.357602  | 0.336608  |
| C  | 2.786040  | 0.432600  | 1.321010  |
| C  | 3.352127  | 1.782235  | -0.625358 |
| C  | 4.084528  | -0.081194 | 1.329646  |
| H  | 2.044988  | 0.115713  | 2.064063  |
| C  | 4.648246  | 1.276998  | -0.591108 |
| H  | 3.028506  | 2.462649  | -1.415588 |
| C  | 5.014115  | 0.344757  | 0.382386  |
| H  | 4.368297  | -0.808716 | 2.093442  |
| H  | 5.370659  | 1.594942  | -1.345941 |
| H  | 6.030172  | -0.056071 | 0.396870  |

M06-2X/def2-TZVP

|    |           |           |           |
|----|-----------|-----------|-----------|
| Bi | 0.254237  | -1.236463 | -0.213220 |
| Cl | -2.037487 | -1.609674 | -1.014249 |
| Cl | -0.267232 | -1.465579 | 2.384921  |
| Cl | 1.096264  | -0.131922 | -2.445507 |
| C  | 0.003520  | 1.036939  | 0.274496  |
| N  | -1.052165 | 1.862020  | 0.287137  |
| N  | 1.084070  | 1.831592  | 0.365996  |
| C  | 0.711548  | 3.158716  | 0.405922  |
| C  | -0.636549 | 3.177497  | 0.358325  |
| H  | 1.435128  | 3.948460  | 0.497971  |
| H  | -1.342378 | 3.987454  | 0.397115  |
| C  | -2.432830 | 1.470757  | 0.252062  |
| C  | -3.213499 | 1.876959  | -0.817524 |
| C  | -2.941830 | 0.701709  | 1.283725  |
| C  | -4.545202 | 1.495782  | -0.854353 |
| H  | -2.770465 | 2.451315  | -1.621311 |
| C  | -4.274016 | 0.320813  | 1.229838  |
| H  | -2.294866 | 0.380623  | 2.090722  |
| C  | -5.073211 | 0.716929  | 0.166948  |
| H  | -5.164175 | 1.791539  | -1.690717 |
| H  | -4.682228 | -0.296133 | 2.018870  |
| H  | -6.110357 | 0.410523  | 0.128675  |
| C  | 2.431810  | 1.355355  | 0.386415  |
| C  | 2.794246  | 0.402539  | 1.327084  |
| C  | 3.332660  | 1.834362  | -0.552016 |
| C  | 4.093726  | -0.090003 | 1.311518  |
| H  | 2.073105  | 0.062356  | 2.063550  |
| C  | 4.629047  | 1.348657  | -0.542664 |
| H  | 3.000248  | 2.537093  | -1.304719 |
| C  | 5.008665  | 0.384712  | 0.383572  |
| H  | 4.388098  | -0.836196 | 2.037536  |
| H  | 5.338078  | 1.705295  | -1.277622 |
| H  | 6.020004  | 0.000500  | 0.377416  |

## NHC<sup>dipp</sup>-BiCl<sub>3</sub>

M06-2X/def2-SV(P)

|    |             |             |             |   |             |             |             |
|----|-------------|-------------|-------------|---|-------------|-------------|-------------|
| Bi | 0.18711700  | -0.00030400 | -1.73150100 | H | -3.59049800 | 3.31351700  | 2.69563200  |
| Cl | -2.25889100 | -0.00009500 | -2.18735000 | H | -2.63945900 | 3.12296600  | -0.97759800 |
| Cl | 0.20787800  | -2.62387300 | -1.41797500 | H | -3.74636300 | 3.94130200  | 0.18208800  |
| Cl | 0.20855600  | 2.62335600  | -1.41891900 | H | -2.03719700 | 4.43798400  | 0.05671800  |
| C  | 0.03912800  | 0.00003600  | 0.62322700  | C | -2.31282500 | -2.55758700 | 1.09750300  |
| N  | -1.00525900 | -0.00000100 | 1.46599400  | C | -2.71919200 | -3.57069100 | 0.02531300  |
| N  | 1.14473900  | -0.00000100 | 1.39597700  | C | -2.52102200 | -3.12436700 | 2.50791500  |
| C  | 0.79432900  | -0.00012200 | 2.73163400  | H | -1.23571000 | -2.37322600 | 0.95425000  |
| C  | -0.56414900 | -0.00011400 | 2.77396700  | H | -2.64009400 | -3.12202700 | -0.97746400 |
| H  | 1.53708700  | -0.00017600 | 3.52374200  | H | -2.03898500 | -4.43746800 | 0.05696100  |
| H  | -1.26222500 | -0.00011700 | 3.60686800  | H | -3.74794800 | -3.93987900 | 0.18167700  |
| C  | -2.40527800 | 0.00029400  | 1.10639700  | H | -2.15994000 | -2.42820000 | 3.28446800  |
| C  | -3.04507200 | 1.23737400  | 0.94152300  | H | -3.59271400 | -3.31270600 | 2.69530100  |
| C  | -3.04569500 | -1.23648900 | 0.94171300  | H | -1.97894700 | -4.07837500 | 2.62334400  |
| C  | -4.40602700 | 1.20847700  | 0.62698400  | C | 2.50246500  | -2.55422700 | 1.07710400  |
| C  | -4.40663900 | -1.20694600 | 0.62718500  | C | 2.90750700  | -2.80929000 | 2.53770900  |
| C  | -5.08004900 | 0.00092300  | 0.47503500  | C | 2.90437200  | -3.75047100 | 0.21269700  |
| H  | -4.94251300 | 2.14849600  | 0.48206700  | H | 1.40584800  | -2.46505100 | 1.02264900  |
| H  | -4.94361200 | -2.14671400 | 0.48243000  | H | 2.58393700  | -1.99892700 | 3.21057700  |
| H  | -6.14285600 | 0.00116100  | 0.22068000  | H | 2.45805900  | -3.75015500 | 2.89788900  |
| C  | 2.48839800  | -0.00003800 | 0.86255400  | H | 4.00464200  | -2.89794600 | 2.62162100  |
| C  | 3.10517900  | -1.24064700 | 0.60644000  | H | 2.72953000  | -3.54813400 | -0.85430700 |
| C  | 3.10517600  | 1.24054500  | 0.60630300  | H | 3.96264800  | -4.02313400 | 0.36984000  |
| C  | 4.36027500  | -1.20859700 | -0.00963100 | H | 2.29168000  | -4.62394900 | 0.48922000  |
| C  | 4.36028400  | 1.20843400  | -0.00974500 | C | 2.50240500  | 2.55419300  | 1.07675100  |
| C  | 4.97204400  | -0.00009800 | -0.32897600 | C | 2.90454700  | 3.75035600  | 0.21234200  |
| H  | 4.86646100  | -2.14676200 | -0.24355300 | C | 2.90708800  | 2.80935700  | 2.53742500  |
| H  | 4.86646800  | 2.14657300  | -0.24376300 | H | 1.40580500  | 2.46502500  | 1.02200300  |
| H  | 5.94770500  | -0.00013700 | -0.82120800 | H | 2.72998100  | 3.54790800  | -0.85468600 |
| C  | -2.31157500 | 2.55814300  | 1.09717100  | H | 2.29178300  | 4.62386000  | 0.48862800  |
| C  | -2.51895600 | 3.12484000  | 2.50774100  | H | 3.96277900  | 4.02303200  | 0.36974700  |
| C  | -2.71787200 | 3.57156900  | 0.02526200  | H | 2.58313300  | 1.99917800  | 3.21032600  |
| H  | -1.23459500 | 2.37333700  | 0.95347600  | H | 4.00422000  | 2.89777800  | 2.62163800  |
| H  | -2.15773700 | 2.42846700  | 3.28404100  | H | 2.45776400  | 3.75037800  | 2.89735700  |
| H  | -1.97650500 | 4.07865400  | 2.62302300  |   |             |             |             |

## NHC<sup>dipp</sup>-BiCl<sub>3</sub>

M06-2X/def2-TZVP

|    |             |             |             |   |             |             |             |
|----|-------------|-------------|-------------|---|-------------|-------------|-------------|
| Bi | 1.74202896  | -0.18890988 | 0.00000000  | H | -2.72489803 | 3.57785201  | 3.26839107  |
| Cl | 2.21949990  | 2.21653713  | 0.00000000  | H | 0.93257799  | 2.71115311  | 3.15606495  |
| Cl | 1.48179688  | -0.19079890 | -2.62197706 | H | -0.26658301 | 3.75874208  | 3.94726199  |
| Cl | 1.48179688  | -0.19079890 | 2.62197706  | H | -0.09707295 | 2.07168208  | 4.43364799  |
| C  | -0.60330604 | -0.03949794 | -0.00000000 | C | -1.11361102 | 2.31648905  | -2.55037002 |
| N  | -1.44695507 | 1.00195203  | -0.00000000 | C | -0.07085000 | 2.74920608  | -3.57975198 |
| N  | -1.37927201 | -1.14064596 | -0.00000000 | C | -2.53048901 | 2.51669302  | -3.09741606 |
| C  | -2.71124102 | -0.78819800 | -0.00000000 | H | -0.95922000 | 1.24957605  | -2.37770002 |
| C  | -2.75229306 | 0.56139000  | -0.00000000 | H | 0.93257799  | 2.71115311  | -3.15606495 |
| H  | -3.49535600 | -1.52235202 | -0.00000000 | H | -0.09707295 | 2.07168208  | -4.43364799 |
| H  | -3.57631108 | 1.25195098  | -0.00000000 | H | -0.26658301 | 3.75874208  | -3.94726199 |
| C  | -1.10093711 | 2.40477204  | -0.00000000 | H | -3.28804002 | 2.14377699  | -2.40570509 |
| C  | -0.95137208 | 3.04391705  | 1.23146801  | H | -2.72489803 | 3.57785201  | -3.26839107 |
| C  | -0.95137208 | 3.04391705  | -1.23146801 | H | -2.64781996 | 1.99162102  | -4.04694407 |
| C  | -0.65435312 | 4.40219906  | 1.20217700  | C | -1.07715206 | -2.49768096 | -2.54685197 |
| C  | -0.65435312 | 4.40219906  | -1.20217700 | C | -2.53863306 | -2.87829700 | -2.82022592 |
| C  | -0.50989918 | 5.07418606  | -0.00000000 | C | -0.21424409 | -2.91854095 | -3.73443800 |
| H  | -0.51955110 | 4.93513207  | 2.13371199  | H | -1.00773509 | -1.41193496 | -2.45781897 |
| H  | -0.51955110 | 4.93513207  | -2.13371199 | H | -3.20950904 | -2.54537602 | -2.02876590 |
| H  | -0.26961921 | 6.12982907  | -0.00000000 | H | -2.87307110 | -2.43081902 | -3.75762591 |
| C  | -0.86874598 | -2.49237695 | -0.00000000 | H | -2.63516803 | -3.96286501 | -2.90670391 |
| C  | -0.63395900 | -3.11382195 | -1.23442198 | H | 0.84593791  | -2.78895892 | -3.52568903 |
| C  | -0.63395900 | -3.11382195 | 1.23442198  | H | -0.40431707 | -3.95766195 | -4.01207899 |
| C  | -0.05974897 | -4.38121693 | -1.20205200 | H | -0.46069413 | -2.29876895 | -4.59686399 |
| C  | -0.05974897 | -4.38121693 | 1.20205200  | C | -1.07715206 | -2.49768096 | 2.54685197  |
| C  | 0.23851609  | -4.99929292 | -0.00000000 | C | -0.21424409 | -2.91854095 | 3.73443800  |
| H  | 0.15708202  | -4.88843293 | -2.13192200 | C | -2.53863306 | -2.87829700 | 2.82022592  |
| H  | 0.15708202  | -4.88843293 | 2.13192200  | H | -1.00773509 | -1.41193496 | 2.45781897  |
| H  | 0.69534512  | -5.98087091 | -0.00000000 | H | 0.84593791  | -2.78895892 | 3.52568903  |
| C  | -1.11361102 | 2.31648905  | 2.55037002  | H | -0.46069413 | -2.29876895 | 4.59686399  |
| C  | -2.53048901 | 2.51669302  | 3.09741606  | H | -0.40431707 | -3.95766195 | 4.01207899  |
| C  | -0.07085000 | 2.74920608  | 3.57975198  | H | -3.20950904 | -2.54537602 | 2.02876590  |
| H  | -0.95922000 | 1.24957605  | 2.37770002  | H | -2.63516803 | -3.96286501 | 2.90670391  |
| H  | -3.28804002 | 2.14377699  | 2.40570509  | H | -2.87307110 | -2.43081902 | 3.75762591  |
| H  | -2.64781996 | 1.99162102  | 4.04694407  |   |             |             |             |

**Table S1.** Crystal data and structure refinement for compound **9**.

|                                   |                                             |                             |
|-----------------------------------|---------------------------------------------|-----------------------------|
| Identification code               | <b>9</b>                                    |                             |
| Empirical formula                 | $C_{31}H_{46}Bi_1Cl_3N_2O_1$                |                             |
| Formula weight                    | 778.03                                      |                             |
| Temperature                       | 173(2) K                                    |                             |
| Wavelength                        | 0.71073 Å                                   |                             |
| Crystal system                    | Monoclinic                                  |                             |
| Space group                       | P2(1)/n                                     |                             |
| Unit cell dimensions              | a = 12.334(3) Å                             | $\alpha = 90^\circ$ .       |
|                                   | b = 15.235(3) Å                             | $\beta = 103.87(3)^\circ$ . |
|                                   | c = 19.277(4) Å                             | $\gamma = 90^\circ$ .       |
| Volume                            | 3516.9(12) Å <sup>3</sup>                   |                             |
| Z                                 | 4                                           |                             |
| Density (calculated)              | 1.469 Mg/m <sup>3</sup>                     |                             |
| Absorption coefficient            | 5.265 mm <sup>-1</sup>                      |                             |
| F(000)                            | 1552                                        |                             |
| Crystal size                      | 0.25 x 0.12 x 0.07 mm <sup>3</sup>          |                             |
| Theta range for data collection   | 3.22 to 24.71°.                             |                             |
| Index ranges                      | -12 ≤ h ≤ 14, -17 ≤ k ≤ 17, -22 ≤ l ≤ 22    |                             |
| Reflections collected             | 27630                                       |                             |
| Independent reflections           | 5972 [R(int) = 0.1238]                      |                             |
| Completeness to theta = 24.71°    | 99.7 %                                      |                             |
| Absorption correction             | Semi-empirical from equivalents             |                             |
| Max. and min. transmission        | 0.7095 and 0.3528                           |                             |
| Refinement method                 | Full-matrix least-squares on F <sup>2</sup> |                             |
| Data / restraints / parameters    | 5972 / 6 / 343                              |                             |
| Goodness-of-fit on F <sup>2</sup> | 0.814                                       |                             |
| Final R indices [I > 2σ(I)]       | R1 = 0.0424, wR2 = 0.0690                   |                             |
| R indices (all data)              | R1 = 0.1140, wR2 = 0.0796                   |                             |
| Largest diff. peak and hole       | 2.671 and -0.782 e.Å <sup>-3</sup>          |                             |

**Table S2.** Crystal data and structure refinement for compound **11**.

|                                   |                                             |                            |
|-----------------------------------|---------------------------------------------|----------------------------|
| Identification code               | <b>11</b>                                   |                            |
| Empirical formula                 | $C_{16}H_{28}Bi_1Cl_2F_3N_2O_4S_1$          |                            |
| Formula weight                    | 681.34                                      |                            |
| Temperature                       | 173(2) K                                    |                            |
| Wavelength                        | 0.71073 Å                                   |                            |
| Crystal system                    | Triclinic                                   |                            |
| Space group                       | P-1                                         |                            |
| Unit cell dimensions              | a = 9.415(2) Å                              | $\alpha = 102.25(3)^\circ$ |
|                                   | b = 10.538(2) Å                             | $\beta = 92.74(3)^\circ$   |
|                                   | c = 12.433(3) Å                             | $\gamma = 95.89(3)^\circ$  |
| Volume                            | 1195.1(4) Å <sup>3</sup>                    |                            |
| Z                                 | 2                                           |                            |
| Density (calculated)              | 1.892 Mg/m <sup>3</sup>                     |                            |
| Absorption coefficient            | 7.728 mm <sup>-1</sup>                      |                            |
| F(000)                            | 660                                         |                            |
| Crystal size                      | 0.25 x 0.18 x 0.15 mm <sup>3</sup>          |                            |
| Theta range for data collection   | 2.87 to 25.03°.                             |                            |
| Index ranges                      | -10 ≤ h ≤ 11, -12 ≤ k ≤ 12, -14 ≤ l ≤ 14    |                            |
| Reflections collected             | 9400                                        |                            |
| Independent reflections           | 4231 [R(int) = 0.0761]                      |                            |
| Completeness to theta = 24.71°    | 99.8 %                                      |                            |
| Absorption correction             | Semi-empirical from equivalents             |                            |
| Max. and min. transmission        | 0.3902 and 0.2482                           |                            |
| Refinement method                 | Full-matrix least-squares on F <sup>2</sup> |                            |
| Data / restraints / parameters    | 4231 / 0 / 262                              |                            |
| Goodness-of-fit on F <sup>2</sup> | 1.052                                       |                            |
| Final R indices [I > 2σ(I)]       | R1 = 0.0556, wR2 = 0.1202                   |                            |
| R indices (all data)              | R1 = 0.0733, wR2 = 0.1303                   |                            |
| Largest diff. peak and hole       | 2.892 and -2.147 e.Å <sup>-3</sup>          |                            |
